# Supplementary material
Source: PubMed Central journal article supplement (PMC3929098)

## Supplemental Figure Legends

**Supplemental Figure 1.** Acetyl- $\alpha$ -tubulin overlapped with ARL13B in the cilia of mouse IMCD3 cells with (*upper panel*) or without (*lower panel*) nicotinamide treatment shown by co-staining with anti-acetyl- $\alpha$ -tubulin antibody (*red*) and anti- $\alpha$ -ARL13B antibody (*green*) and counterstained with DAPI (*blue*). Scale bar, 10  $\mu$ m.

**Supplemental Figure 2.** Mouse IMCD3 cells with nicotinamide treatment were stained with anti-SIRT2 antibody (*red*) and anti-acetyl- $\alpha$ -tubulin antibody (*green*) and counterstained with DAPI (*blue*). Arrows point basal body. Scale bar, 10  $\mu$ m.

**Supplemental Figure 3.** (A) Quantification of BrdU staining in mouse IMCD3 cells with nicotinamide treatment at the indicated time points following serum refeeding. (B) Quantification of BrdU staining in mouse IMCD3 cells transduced with pGIPZ-NS or pGIPZ-shPkd1 at the indicated time points following serum refeeding.

**Supplemental Figure 4. Knockdown of SIRT2 increases cilia length in Kupffer's vesicle of zebrafish embryos.** (A) The knockdown efficiency of SIRT2 morpholino (SIRT2-Mor-2) targeting intron 1 - exon 2 site was analyzed by reverse transcription PCR. (D) Whole-mount immunofluorescence microscopy of cilia at the Kupffer's vesicle in embryos at the 10 SS, injected with control or SIRT2 morpholino (SIRT2-Mor-2). Scale bar, 5  $\mu$ m. (E) Cilia lengths in Kupffer's vesicle (KV) were measured at the 10 SS embryos injected with control or SIRT2 morpholino (SIRT2-Mor-2) respectively. n represents total cilia numbers that were measured for cilia length from 7 embryos per group. \*\*  $p < 0.01$ . (F) Cilia numbers in Kupffer's vesicle (KV) (n = 10) at the 10 SS embryos injected with control or SIRT2 morpholino (SIRT2-Mor-2) respectively.

**Supplemental Figure 5. Knockdown or loss of *Pkd1* leads to aberrant centrosome amplification and atypical mitoses.** (A) Cells with *Pkd1* knockdown show abnormal centrosome numbers. Mouse IMCD3 cells transduced with lentivirus carrying pGIPZ-NS (control) or pGIPZ-sh*Pkd1* vectors were immunostained for pericentrin (*red*) to visualize the centrosomes and were counterstained with DAPI (*blue*). Scale bar, 10  $\mu$ m. (B) Cells with *Pkd1* knockdown show atypical mitoses with multipolar spindles. Mouse IMCD3 cells transduced with pGIPZ-NS or pGIPZ-sh*Pkd1* were immunostained for acetyl- $\alpha$ -tubulin (*red*) to visualize the spindle and were counterstained with DAPI (*blue*). Scale bar, 10  $\mu$ m. (C and D) Abnormal centrosome amplification was detected in kidneys from *Pkd1*<sup>flox/flox</sup>:*Ksp-Cre* mice (C, right) and ADPKD patients (D, right) but not in age-matched wild type kidneys (C, left) and normal human kidneys (D, left). Pericentrin (*red*), DAPI (*blue*).

**Supplemental Figure 6. SIRT2 colocalized with centrosomes in *Pkd1* null MEK cells.** *Pkd1* null MEK cells were immunostained with anti-SIRT2 (*green*) antibody and anti- $\gamma$ -tubulin (*red*) antibody, a centrosome marker, and counterstained with DAPI (*blue*). Scale bar, 10  $\mu$ m.

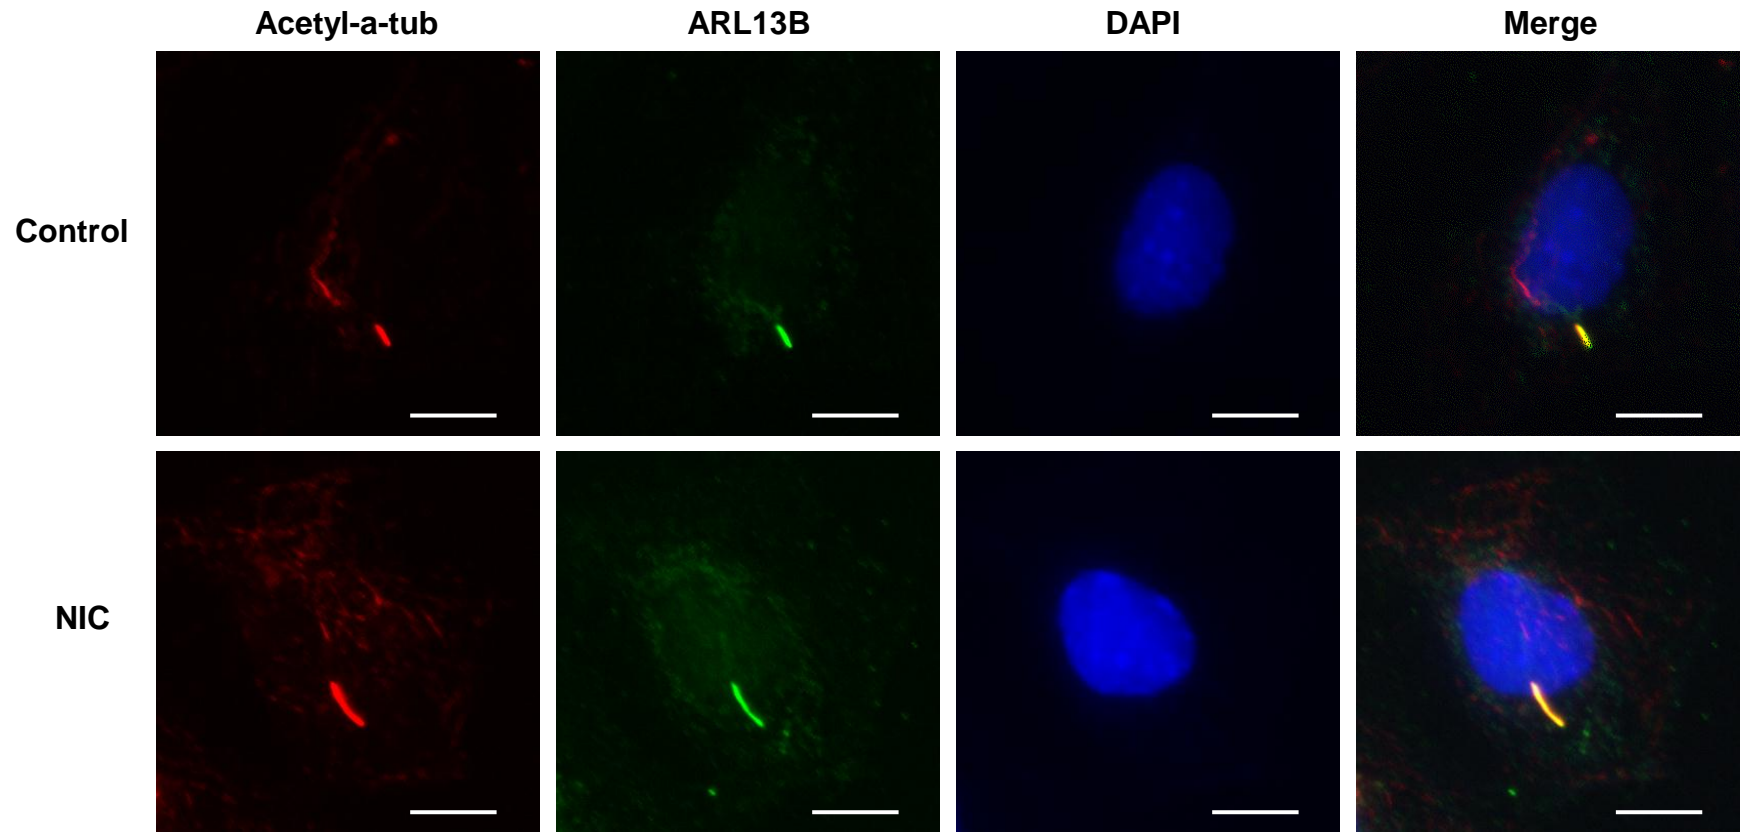

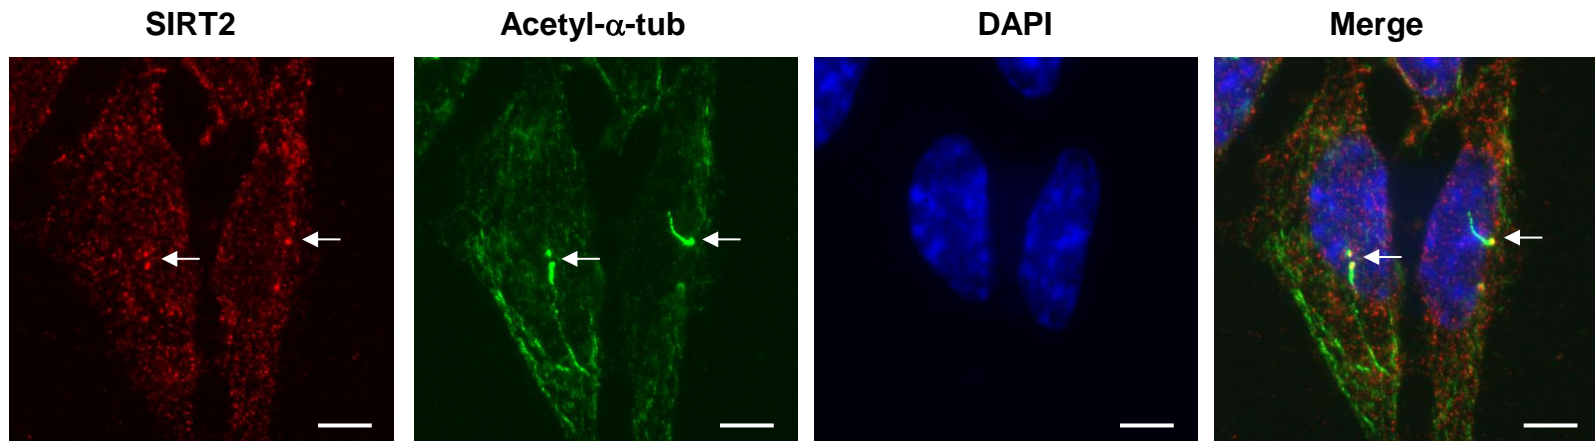

**A**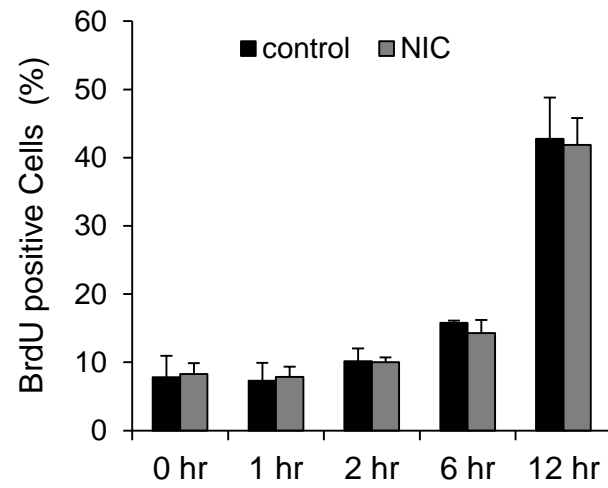**B**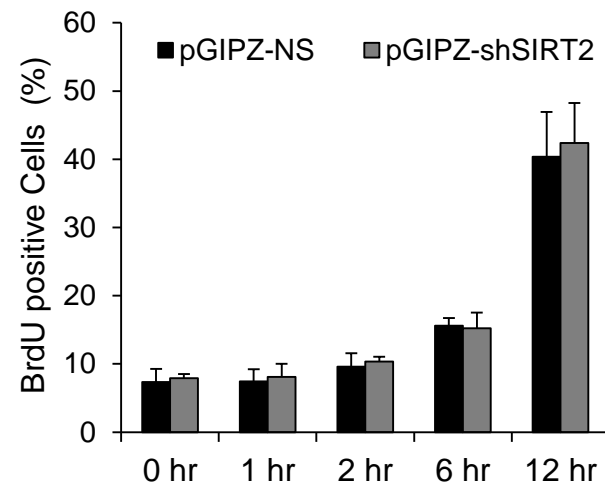

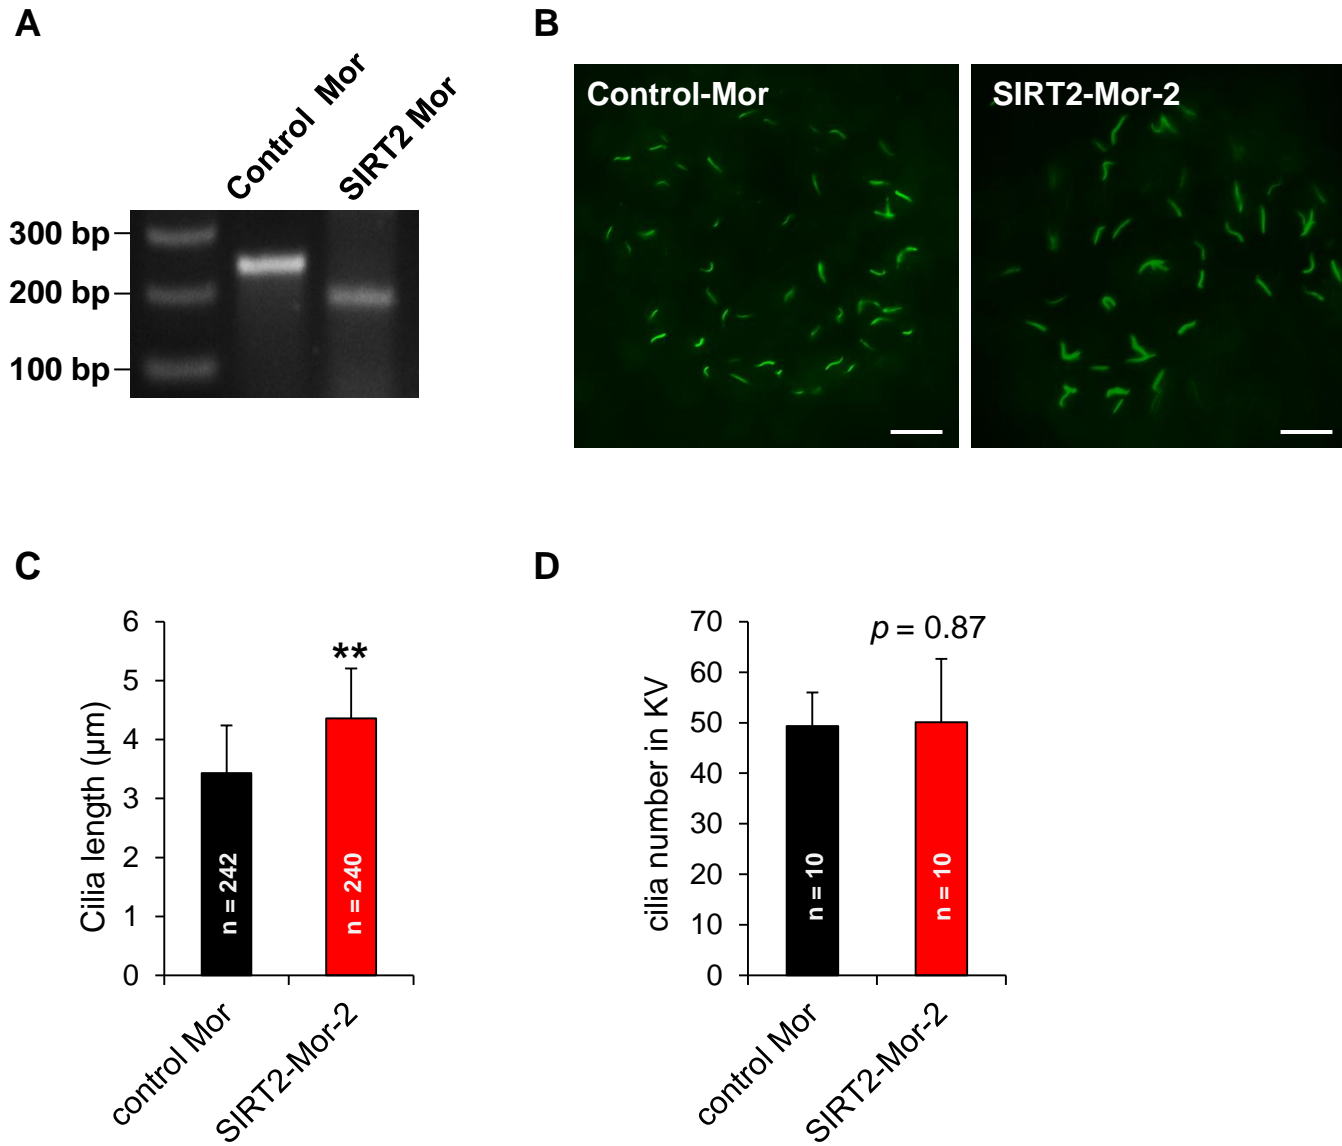

A

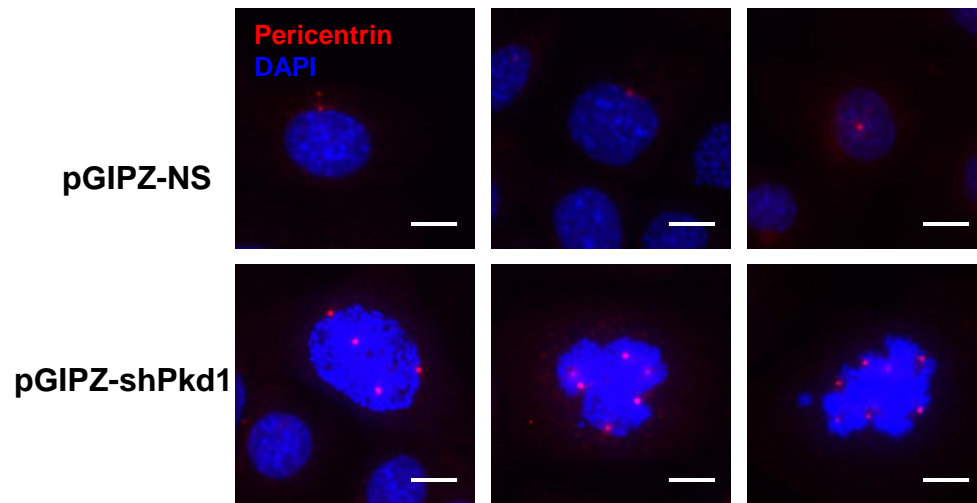

B

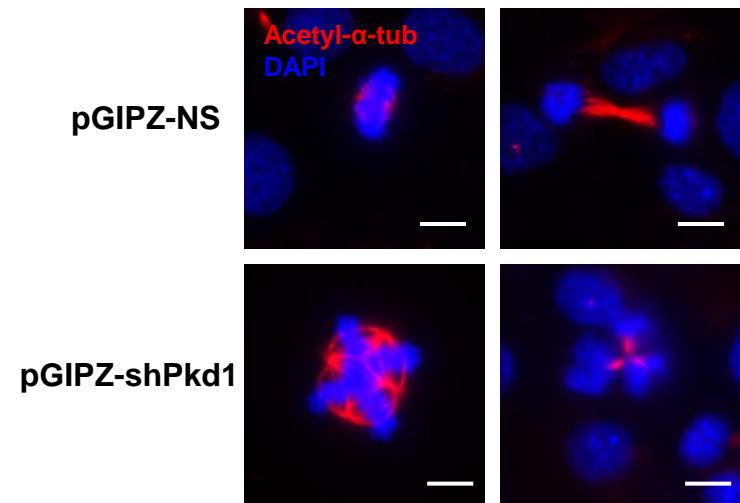

C

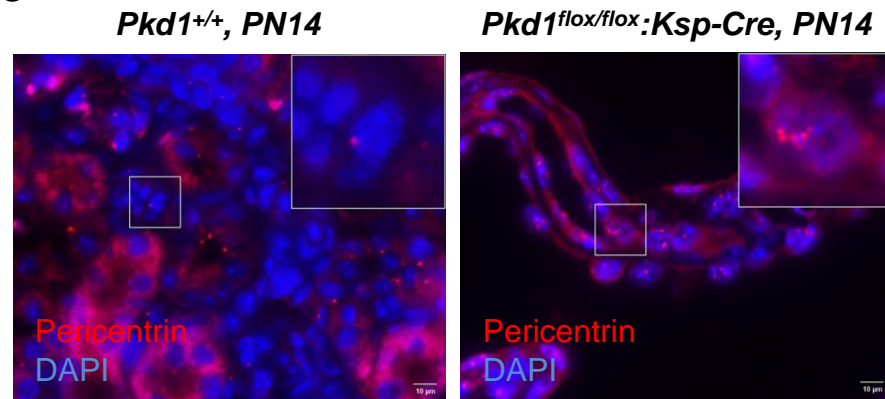

D

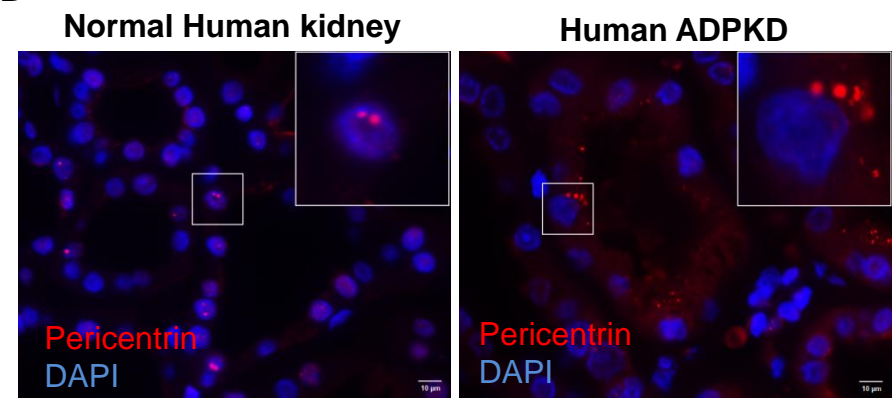

SIRT2

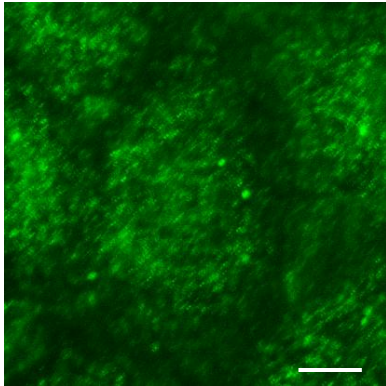

$\gamma$ -tubulin

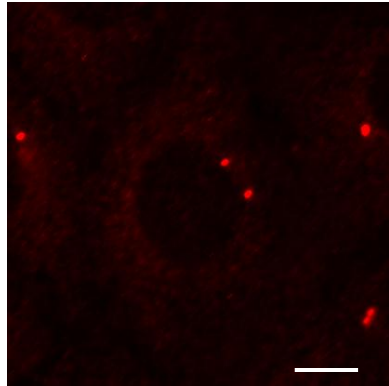

DAPI

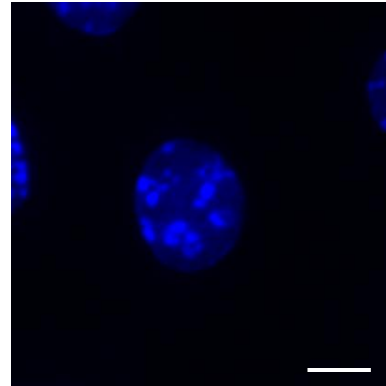

Merge

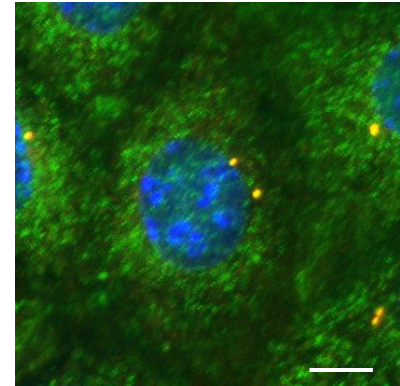

Supplement: supp_ddt556_ddt556supp.pdf [file supp_ddt556_ddt556supp.pdf]
